# Supplementary material
Source: PubMed Central journal article supplement (PMC64673)

**A**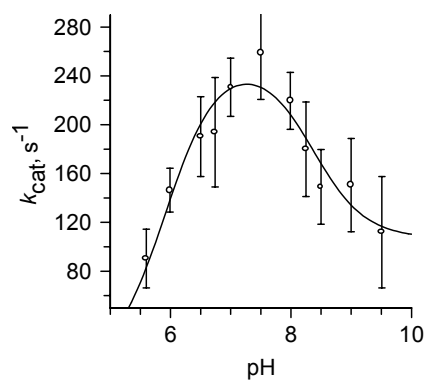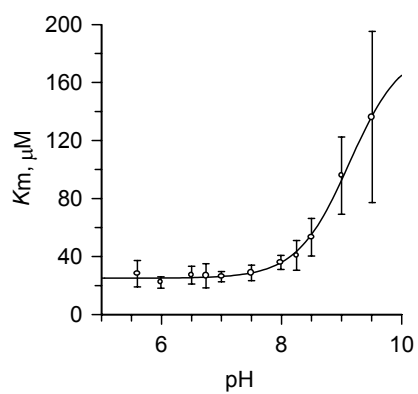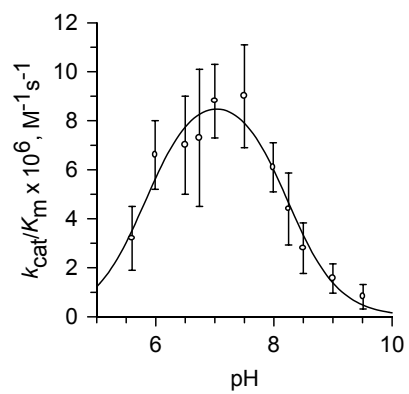**B**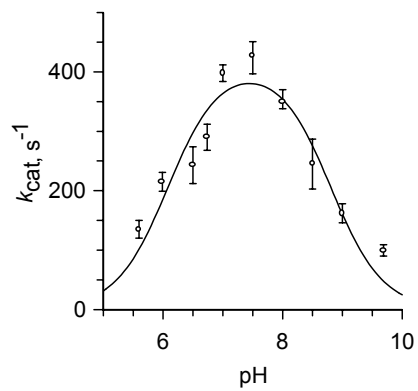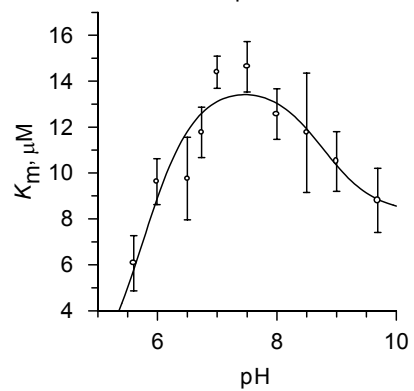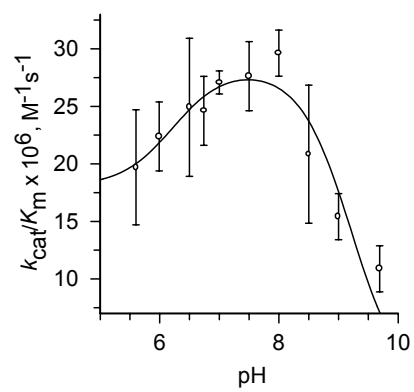

Supplement: pnas_241442898_4.pdf [file pnas_241442898_4.pdf]

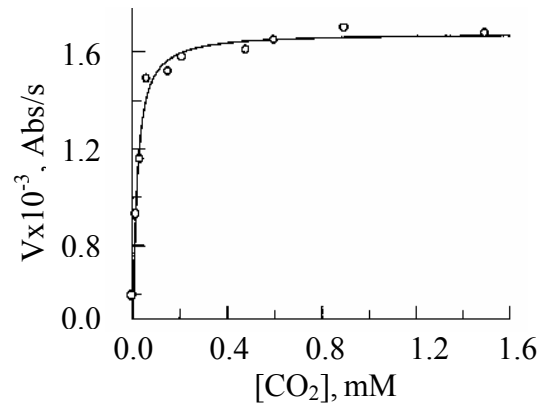

Supplement: pnas_241442898_5.pdf [file pnas_241442898_5.pdf]
